# Supplementary material for: Physical Mechanisms of Intermolecular Interactions and Cross-Space Charge Transfer in Two-Photon BDBT-TCNB Co-Crystals
Source: MDPI journal article supplement (doi:10.3390/nano12162757), 2022-08-11
Supplement: s1 [file s1]

**Table S1.** Real space functions of BCPs.

| a.u.    | Density of All<br>Electrons | Lagrangian<br>Kinetic Energy<br>G(r) | Hamiltonian<br>Kinetic Energy<br>K(r) | Potential Ener-<br>gy Density V(r) | Energy Density<br>E(r) or H(r) | Laplacian of<br>Electron Den-<br>sity | Electron Local-<br>ization Function<br>(ELF) | Localized Or-<br>bital Locator<br>(LOL) |
|---------|-----------------------------|--------------------------------------|---------------------------------------|------------------------------------|--------------------------------|---------------------------------------|----------------------------------------------|-----------------------------------------|
| 1(C-C)  | 0.0051063485                | 0.0029673956                         | -0.0007859007                         | -0.0021814949                      | 0.0007859007                   | 0.0150131850                          | 0.0208770678                                 | 0.1277903658                            |
| 2(C-C)  | 0.0064904186                | 0.0037072615                         | -0.0008295938                         | -0.0028776677                      | 0.0008295938                   | 0.0181474214                          | 0.0295290299                                 | 0.1488676420                            |
| 3(C-C)  | 0.0061834077                | 0.0035426616                         | -0.0007827635                         | -0.0027598981                      | 0.0007827635                   | 0.0173017001                          | 0.0275624305                                 | 0.1444442839                            |
| 4(C-C)  | 0.0051872817                | 0.0031608872                         | -0.0008222022                         | -0.0023386850                      | 0.0008222022                   | 0.0159323578                          | 0.0194262343                                 | 0.1237272293                            |
| 5(C-N)  | 0.0039838368                | 0.0025539379                         | -0.0005225353                         | -0.0020314026                      | 0.0005225353                   | 0.0123058928                          | 0.0124137315                                 | 0.1011672008                            |
| 6(S-C)  | 0.0080338596                | 0.0047167471                         | -0.0011163915                         | -0.0036003557                      | 0.0011163915                   | 0.0233325543                          | 0.0369058586                                 | 0.1639985766                            |
| 7(H-N)  | 0.0055498658                | 0.0037842226                         | -0.0009242861                         | -0.0028599365                      | 0.0009242861                   | 0.0188340347                          | 0.0170361212                                 | 0.1166051129                            |
| 8(S-N)  | 0.0022483997                | 0.0015370029                         | -0.0005474467                         | -0.0009895563                      | 0.0005474467                   | 0.0083377983                          | 0.0051032245                                 | 0.0672388411                            |
| 9(N-C)  | 0.0040950627                | 0.0025698333                         | -0.0005516093                         | -0.0020182241                      | 0.0005516093                   | 0.0124857703                          | 0.0134261652                                 | 0.1048338511                            |
| 10(C-C) | 0.0052741821                | 0.0031747771                         | -0.0007402748                         | -0.0024345022                      | 0.0007402748                   | 0.0156602075                          | 0.0203348288                                 | 0.1262761722                            |
| 11(C-C) | 0.0058876388                | 0.0035207265                         | -0.0008436922                         | -0.0026770343                      | 0.0008436922                   | 0.0174576748                          | 0.0237915168                                 | 0.1353644579                            |
| 12(C-C) | 0.0059158507                | 0.0035353505                         | -0.0009506947                         | -0.0025846558                      | 0.0009506947                   | 0.0179441808                          | 0.0239702506                                 | 0.1358124179                            |
| 13(C-C) | 0.0066310608                | 0.0038859740                         | -0.0008666705                         | -0.0030193035                      | 0.0008666705                   | 0.0190105777                          | 0.0288923254                                 | 0.1474351796                            |
| 14(C-N) | 0.0020285369                | 0.0013248710                         | -0.0004059123                         | -0.0009189587                      | 0.0004059123                   | 0.0069231335                          | 0.0048650081                                 | 0.0658113893                            |
| 15(H-N) | 0.0096469294                | 0.0071935818                         | -0.0013340326                         | -0.0058595492                      | 0.0013340326                   | 0.0341104574                          | 0.0294677624                                 | 0.1485670081                            |
| 16(N-H) | 0.0044046580                | 0.0030335927                         | -0.0008317821                         | -0.0022018106                      | 0.0008317821                   | 0.0154614994                          | 0.0123128193                                 | 0.1007361698                            |
| 17(H-N) | 0.0032407967                | 0.0022647694                         | -0.0006918486                         | -0.0015729208                      | 0.0006918486                   | 0.0118264720                          | 0.0079609307                                 | 0.0825493462                            |
| 18(N-H) | 0.0027702573                | 0.0019971766                         | -0.0006535926                         | -0.0013435840                      | 0.0006535926                   | 0.0106030769                          | 0.0060727807                                 | 0.0728353930                            |

**Table S2.** Numerical values for the energy decomposition of the four dimers.

| kcal/mol       | Dimer 1       | Dimer 2      | Dimer 3       | Dimer 4      |
|----------------|---------------|--------------|---------------|--------------|
| Electrostatics | -10.3 (28.5%) | -0.2 (8.3%)  | -10.5 (28.7%) | -2.5 (39.1%) |
| Exchange       | 18.6          | 1.2          | 18.0          | 3.3          |
| Induction      | -4.0 (11.1%)  | -0.3 (12.5%) | -3.5 (9.6%)   | -0.6 (9.4%)  |
| Dispersion     | -21.8 (60.4%) | -1.9 (79.2%) | -22.6 (61.7%) | -3.3 (51.5%) |
| Total          | -17.5         | -1.2         | -18.6         | -3.1         |

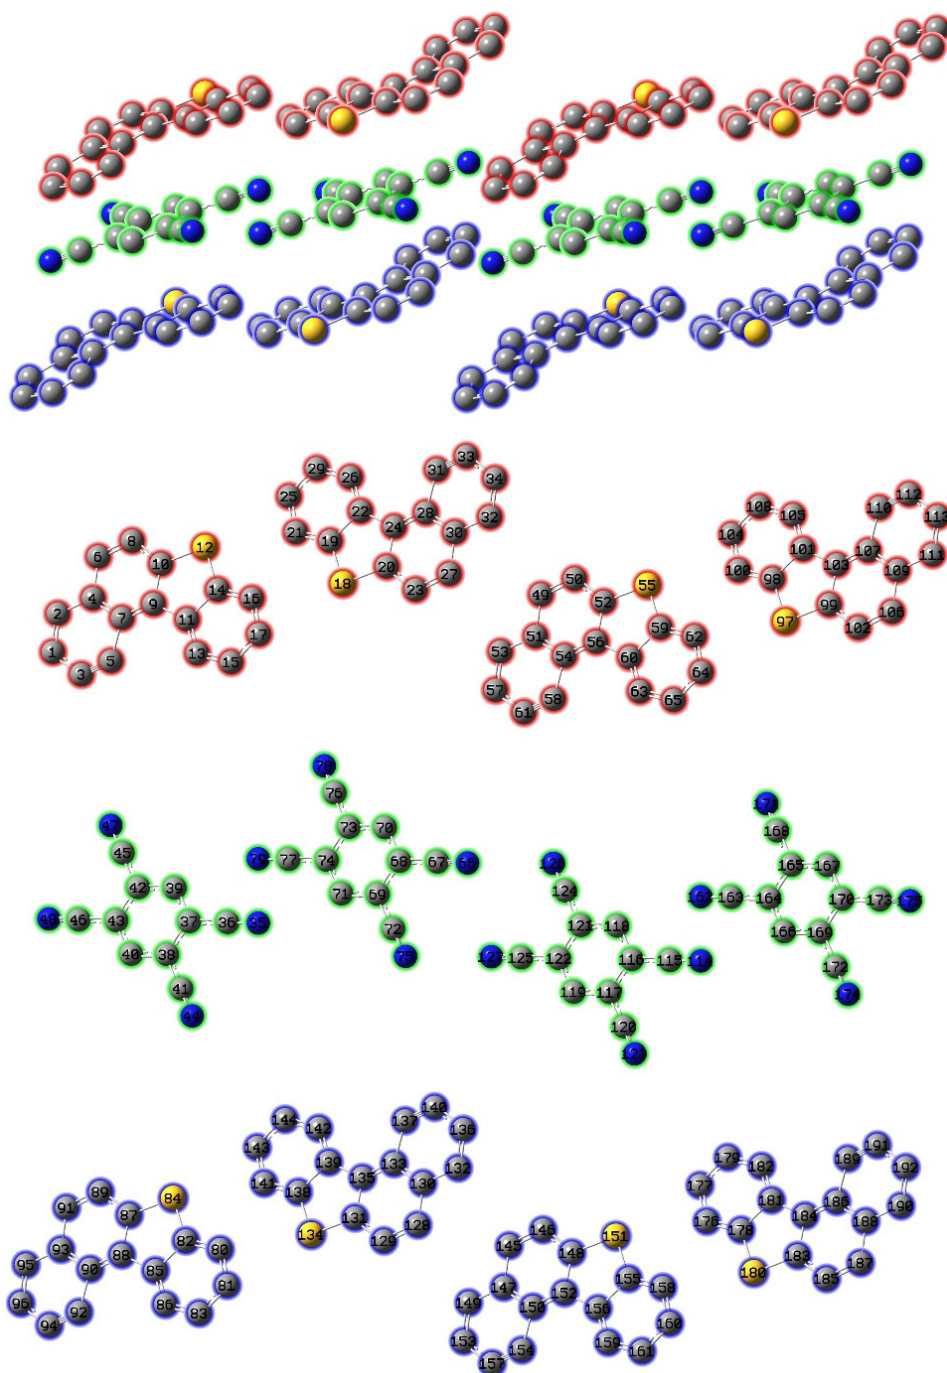

Figure S1. BTC's atomic number.
